# Supplementary material for: Comparative Profiling of microRNA Expression in Soybean Seeds from Genetically Modified Plants and their Near-Isogenic Parental Lines
Source: PubMed Central journal article supplement (PMC4876996; doi:10.1371/journal.pone.0155896), 2016-05-23

**Supplemental File:**  
**Figure\_S1.** Chromosomal distribution of rRNA derived small RNAs.

Paper title: "Comparative profiling of microRNA expression in soybean seeds from genetically modified plants and their near-isogenic parental lines"  
Author: Yong Wang, Qingkuo Lan, Xin Zhao, Wentao Xu, Feiwu Li, Qinying Wang\*, Rui Chen\*  
Date: Mar. 2016  
Contact: chenrui.2011@outlook.com.

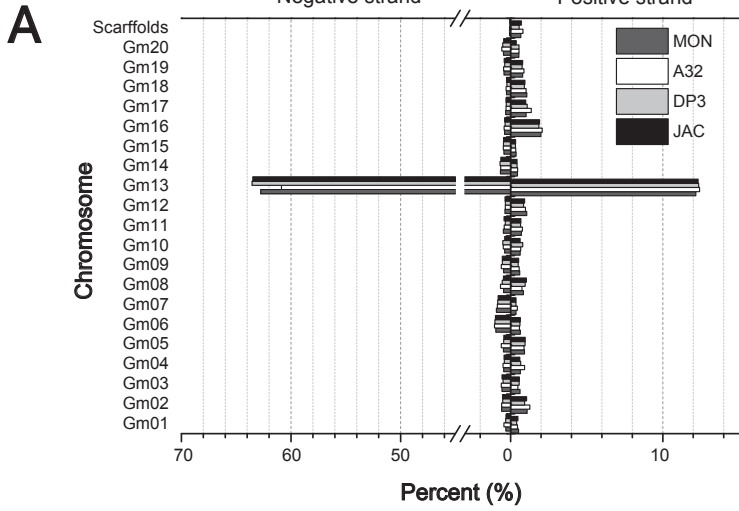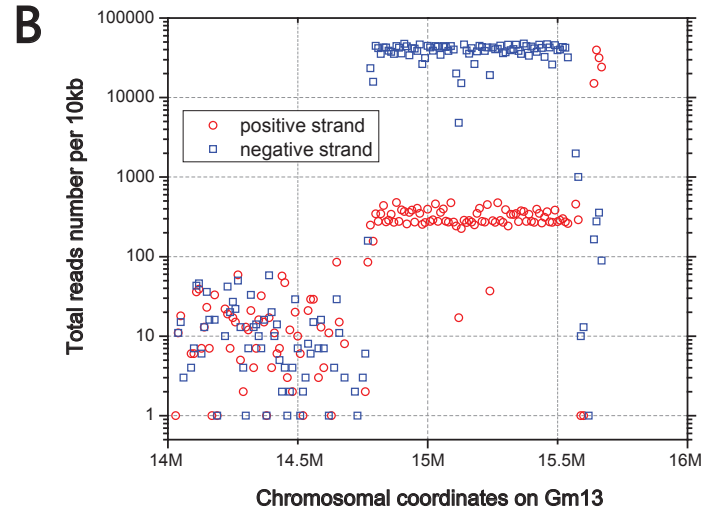

Supplement: pone.0155896.s001.pdf [file pone.0155896.s001.pdf]
